# Supplementary material for: Association between Alcohol Consumption and Body Composition in Russian Adults and Patients Treated for Alcohol-Related Disorders: The Know Your Heart Cross-Sectional Study
Source: MDPI journal article supplement (doi:10.3390/ijerph20042905), 2023-02-07
Supplement: s1 [file s1]

## Supplementary Materials

**Table S1.** Types of alcoholic beverages consumed in the last 12 months in the sample of drinkers from the general population divided by total annual alcohol intake and in patients treated for alcohol-related disorders, by sex.

| Study variables                                              | Drinking men         |                    |                  |                 | Drinking women       |                    |                  |                 |
|--------------------------------------------------------------|----------------------|--------------------|------------------|-----------------|----------------------|--------------------|------------------|-----------------|
|                                                              | Non-problem drinkers | Hazardous drinkers | Harmful drinkers | Narcology       | Non-problem drinkers | Hazardous drinkers | Harmful drinkers | Narcology       |
| Frequency of beer drinking, N (%)                            |                      |                    |                  |                 |                      |                    |                  |                 |
| A few times per year or never                                | 356 (71.2)           | 164 (58.4)         | 55 (59.8)        | 142 (68.6)      | 1058 (91.5)          | 66 (83.5)          | 8 (61.5)         | 49 (76.6)       |
| 1 time per month – 2 times per week                          | 133 (26.6)           | 93 (33.1)          | 29 (31.5)        | 39 (18.8)       | 97 (8.4)             | 13 (16.5)          | 3 (23.1)         | 9 (14.1)        |
| 3 or more times per week                                     | 11 (2.2)             | 24 (8.5)           | 8 (8.7)          | 26 (12.6)       | 1 (0.1)              | —                  | 2 (15.4)         | 6 (9.3)         |
| Frequency of wine drinking, N (%)                            |                      |                    |                  |                 |                      |                    |                  |                 |
| A few times per year or never                                | 394 (78.8)           | 211 (75.1)         | 74 (80.4)        | 165 (80.5)      | 875 (75.7)           | 47 (59.5)          | 10 (76.9)        | 49 (75.4)       |
| 1 time per month – 2 times per week                          | 92 (18.4)            | 58 (20.6)          | 12 (13.0)        | 28 (13.7)       | 276 (23.9)           | 28 (35.4)          | 2 (15.4)         | 14 (21.5)       |
| 3 or more times per week                                     | 14 (2.8)             | 12 (4.3)           | 6 (6.6)          | 12 (5.9)        | 5 (0.4)              | 4 (5.1)            | 1 (7.7)          | 2 (3.1)         |
| Frequency of spirits drinking, N (%)                         |                      |                    |                  |                 |                      |                    |                  |                 |
| A few times per year or never                                | 271 (54.2)           | 65 (23.1)          | 25 (27.2)        | 68 (32.8)       | 998 (86.3)           | 49 (62.0)          | 7 (53.9)         | 34 (53.1)       |
| 1 time per month – 2 times per week                          | 202 (40.4)           | 182 (64.8)         | 50 (54.4)        | 85 (41.1)       | 153 (13.2)           | 30 (38.0)          | 5 (38.5)         | 15 (23.4)       |
| 3 or more times per week                                     | 27 (5.4)             | 34 (12.1)          | 17 (18.4)        | 54 (26.1)       | 5 (0.4)              | —                  | 1 (7.7)          | 15 (23.4)       |
| Amount of beer consumption per occasion, N (%)               |                      |                    |                  |                 |                      |                    |                  |                 |
| Never drinks beer                                            | 277 (55.4)           | 135 (48.0)         | 41 (44.6)        | 126 (61.2)      | 904 (78.2)           | 52 (65.8)          | 8 (61.5)         | 44 (67.7)       |
| 1 bottle (0.5l) or less                                      | 121 (24.2)           | 34 (12.1)          | 21 (22.8)        | 58 (28.2)       | 202 (17.5)           | 8 (10.1)           | —                | 15 (23.1)       |
| 2-4 bottles                                                  | 97 (19.4)            | 99 (35.2)          | 21 (22.8)        | 16 (7.8)        | 50 (4.3)             | 18 (22.8)          | 4 (30.8)         | 3 (4.6)         |
| More than 5 bottles                                          | 5 (1.0)              | 13 (4.6)           | 9 (9.8)          | 6 (2.9)         | —                    | 1 (1.3)            | 1 (7.7)          | 3 (4.6)         |
| Amount of wine consumption per occasion, N (%)               |                      |                    |                  |                 |                      |                    |                  |                 |
| Never drinks wine                                            | 281 (56.2)           | 171 (60.9)         | 59 (64.1)        | 146 (71.9)      | 388 (33.6)           | 29 (36.7)          | 8 (61.5)         | 37 (57.8)       |
| 1 glass (0.2l) or less                                       | 87 (17.4)            | 24 (8.5)           | 8 (8.7)          | 8 (3.9)         | 416 (36.0)           | 9 (11.4)           | —                | 8 (12.5)        |
| 2-4 glasses                                                  | 125 (25.0)           | 70 (24.9)          | 15 (16.3)        | 34 (16.8)       | 346 (29.9)           | 35 (43.0)          | 4 (30.8)         | 17 (26.6)       |
| More than 5 glasses                                          | 7 (1.4)              | 16 (5.7)           | 10 (10.9)        | 15 (7.4)        | 6 (0.5)              | 7 (8.9)            | 1 (7.7)          | 2 (3.1)         |
| Amount of spirits consumption per occasion, N (%)            |                      |                    |                  |                 |                      |                    |                  |                 |
| Never drinks spirits                                         | 83 (16.6)            | 17 (6.1)           | 2 (2.2)          | 4 (1.9)         | 626 (54.2)           | 24 (30.4)          | 5 (38.5)         | 12 (18.8)       |
| 1 shot (0.05l) or less                                       | 34 (6.8)             | 4 (1.4)            | —                | 4 (1.9)         | 143 (12.4)           | —                  | 1 (7.7)          | 1 (1.6)         |
| 2-4 shots                                                    | 241 (48.7)           | 83 (29.5)          | 14 (15.2)        | 39 (18.9)       | 345 (29.8)           | 29 (36.7)          | 2 (15.4)         | 18 (28.1)       |
| More than 5 shots                                            | 139 (27.9)           | 177 (63.0)         | 76 (82.6)        | 159 (77.3)      | 42 (3.6)             | 26 (32.9)          | 5 (38.5)         | 33 (51.6)       |
| Annual volume of ethanol from beer, l/year, Me (P25; P75)    | 0.0 (0.0; 0.7)       | 0.1 (0; 2.0)       | 0.1 (0; 1.6)     | 0.0 (0; 0.68)   | 0.0 (0.0; 0.0)       | 0.0 (0.0; 0.3)     | 0.0 (0.0; 5.3)   | 0.0 (0.0; 0.1)  |
| Annual volume of ethanol from wine, l/year, Me (P25; P75)    | 0.0 (0.0; 0.5)       | 0.0 (0.0; 0.7)     | 0.0 (0.0; 0.7)   | 0.0 (0.0; 0.2)  | 0.2 (0.0; 0.5)       | 0.5 (0.0; 1.2)     | 0.0 (0.0; 0.9)   | 0.0 (0.0; 0.7)  |
| Annual volume of ethanol from spirits, l/year, Me (P25; P75) | 1.2 (0.4; 2.8)       | 4.0 (1.7; 9.2)     | 5.1 (2.8; 12.9)  | 5.1 (1.7; 16.6) | 0.0 (0.0; 0.4)       | 1.2 (0.0; 2.8)     | 1.1 (0.0; 2.8)   | 1.7 (0.7; 12.9) |

**Table S2.** Dietary quality and physical activity categories in the general population groups \* defined by annual alcohol intake, by sex.

|                          | Men (N = 1189) |                      |                    |                  |           | Women (N = 1440) |                      |                    |                  |           |
|--------------------------|----------------|----------------------|--------------------|------------------|-----------|------------------|----------------------|--------------------|------------------|-----------|
|                          | Non-drinkers   | Non-problem drinkers | Hazardous drinkers | Harmful drinkers | p-value** | Non-drinkers     | Non-problem drinkers | Hazardous drinkers | Harmful drinkers | p-value** |
| N                        | 109            | 500                  | 281                | 92               |           | 127              | 1156                 | 79                 | 13               |           |
| Dietary quality, N (%)   |                |                      |                    |                  | 0.048     |                  |                      |                    |                  | 0.432     |
| Unhealthy diet           | 6 (5.6)        | 25 (5.0)             | 20 (7.1)           | 7 (7.6)          |           | 9 (7.1)          | 47 (4.1)             | 6 (7.6)            | 1 (7.6)          |           |
| Average diet             | 73 (67.6)      | 345 (69.4)           | 194 (69.0)         | 76 (82.6)        |           | 74 (58.7)        | 689 (59.8)           | 49 (62.0)          | 6 (46.2)         |           |
| Healthy diet             | 29 (26.9)      | 127 (25.6)           | 67 (23.9)          | 9 (9.8)          |           | 43 (34.1)        | 416 (36.1)           | 24 (30.4)          | 6 (46.2)         |           |
| Physical activity, N (%) |                |                      |                    |                  | 0.429     |                  |                      |                    |                  | 0.027     |
| Inactive                 | 4 (3.7)        | 25 (5.0)             | 16 (5.7)           | 6 (6.5)          |           | 5 (4.0)          | 87 (7.6)             | 3 (3.8)            | 2 (15.4)         |           |
| Moderately inactive      | 8 (7.3)        | 54 (10.9)            | 27 (9.7)           | 12 (13.0)        |           | 13 (10.4)        | 110 (9.6)            | 8 (10.1)           | 4 (30.8)         |           |
| Moderately active        | 56 (51.4)      | 279 (56.1)           | 138 (49.5)         | 47 (51.1)        |           | 79 (63.2)        | 673 (58.4)           | 42 (53.2)          | 2 (15.4)         |           |
| Active                   | 41 (37.6)      | 139 (28.0)           | 98 (35.1)          | 27 (29.4)        |           | 28 (22.4)        | 282 (24.5)           | 26 (32.9)          | 5 (38.4)         |           |

\* Data on physical activity and dietary quality was not available for the group of patients treated for alcohol-related diagnoses (narcoleptical patients). \*\* p-value from Pearson chi-squared test.

**Table S3.** Age-standardized means with 95% Confidence Intervals \* of body composition parameters in the general population groups defined by annual alcohol intake and in the group of narcological patients, by sex.

| Characteristics          | Men (N = 1189)       |                      |                          |                             |                             | Women (N = 1440)     |                      |                      |                      |                           |
|--------------------------|----------------------|----------------------|--------------------------|-----------------------------|-----------------------------|----------------------|----------------------|----------------------|----------------------|---------------------------|
|                          | Non-drinkers         | Non-problem drinkers | Hazardous drinkers       | Harmful drinkers            | Narcology group             | Non-drinkers         | Non-problem drinkers | Hazardous drinkers   | Harmful drinkers     | Narcology group           |
| N                        | 109                  | 500                  | 281                      | 92                          | 207                         | 127                  | 1156                 | 79                   | 13                   | 65                        |
| Height (cm)              | 173.9 (172.8; 175.1) | 176.2 (175.6; 176.8) | 175.7 (175.0; 176.4)     | <b>173.9 (172.6; 175.1)</b> | <b>172.7 (171.7; 173.6)</b> | 161.0 (159.7; 162.3) | 162.1 (161.8; 162.4) | 162.0 (160.8; 163.3) | 163.9 (162.2; 165.6) | 160.9 (159.8; 161.9)      |
| Weight (kg)              | 82.8 (79.5; 86.1)    | 85.4 (84.0; 86.9)    | 86.2 (84.4; 87.9)        | <b>76.8 (74.1; 79.6)</b>    | <b>71.7 (69.6; 73.9)</b>    | 71.1 (67.6; 74.6)    | 72.8 (71.9; 73.7)    | 72.9 (69.8; 76.0)    | 81.2 (75.5; 86.9)    | 68.9 (65.5; 72.3)         |
| BMI (kg/m <sup>2</sup> ) | 27.3 (26.4; 28.2)    | 27.5 (27.1; 27.9)    | 27.9 (27.4; 28.4)        | <b>25.4 (24.5; 26.2)</b>    | <b>24.0 (23.4; 24.6)</b>    | 27.4 (26.2; 28.6)    | 27.7 (27.4; 28.1)    | 27.7 (26.6; 28.8)    | 30.6 (28.3; 33.0)    | 26.6 (25.4; 27.8)         |
| WC (cm)                  | 94.3 (91.7; 97.0)    | 94.8 (93.8; 95.9)    | 97.1 (95.7; 98.4)        | 91.6 (89.2; 93.9)           | <b>86.3 (84.3; 88.4)</b>    | 86.1 (83.0; 89.2)    | 87.1 (86.4; 87.9)    | 88.3 (85.6; 91.0)    | 95.5 (89.5; 101.5)   | 87.3 (84.7; 90.0)         |
| HC (cm)                  | 101.0 (99.2; 102.7)  | 101.3 (100.6; 102.1) | 101.6 (100.7; 102.5)     | <b>97.1 (95.7; 98.6)</b>    | <b>94.2 (92.9; 95.4)</b>    | 103.7 (101.3; 106.2) | 104.6 (104.0; 105.3) | 103.6 (101.3; 106.0) | 109.7 (106.4; 113.1) | <b>98.7 (96.2; 101.3)</b> |
| WHR                      | 0.93 (0.92; 0.95)    | 0.93 (0.93; 0.94)    | <b>0.95 (0.95; 0.96)</b> | 0.94 (0.93; 0.95)           | 0.91 (0.90; 0.93)           | 0.83 (0.81; 0.84)    | 0.83 (0.83; 0.83)    | 0.85 (0.83; 0.87)    | 0.86 (0.83; 0.90)    | 0.88 (0.87; 0.89)         |
| %Fat mass                | 21.8 (20.3; 23.3)    | 22.2 (21.6; 22.8)    | <b>23.6 (22.9; 24.3)</b> | <b>20.0 (18.6; 21.4)</b>    | <b>19.0 (17.9; 20.2)</b>    | 33.7 (32.1; 35.3)    | 34.6 (34.2; 35.0)    | 34.7 (33.2; 36.2)    | 37.9 (33.8; 42.1)    | 33.2 (31.1; 35.3)         |

Abbreviation: Body Mass Index (BMI), Body Weight (BW), Hip Circumference (HC), Waist Circumference (WC), Waist-to-hip ratio (WHR). \* Data are standardized to the Standard European Population 2013.

**Table S4.** Associations of the alcohol consumption levels with body composition parameters in men and women from the general population sample with additional adjustments for dietary quality and physical activity \*, B-coefficients with 95% Confidence Intervals.

| Drinker group        | BMI                         | WC                          | HC                          | WHR                      | %FM                         |
|----------------------|-----------------------------|-----------------------------|-----------------------------|--------------------------|-----------------------------|
| Men                  |                             |                             |                             |                          |                             |
| Non-problem drinkers | Ref.                        | Ref.                        | Ref.                        | Ref.                     | Ref.                        |
| Non-drinkers         | -0.30 (-1.23; 0.63)         | -0.06 (-2.46; 2.34)         | -0.37 (-1.23; 1.98)         | -0.01 (-0.02; 0.01)      | -0.63 (-1.99; 0.73)         |
| Hazardous drinkers   | 0.31 (-0.35; 0.97)          | <b>2.04 (0.34; 3.73)</b>    | 0.45 (-0.69; 1.59)          | <b>0.02 (0.01; 0.02)</b> | <b>1.18 (0.21; 2.14)</b>    |
| Harmful drinkers     | <b>-1.73 (-2.75; -0.70)</b> | -1.99 (-4.62; 0.64)         | <b>-2.55 (-4.32; -0.79)</b> | 0.00 (-0.01; 0.02)       | <b>-1.78 (-3.27; -0.29)</b> |
| Women                |                             |                             |                             |                          |                             |
| Non-problem drinkers | Ref.                        | Ref.                        | Ref.                        | Ref.                     | Ref.                        |
| Non-drinkers         | <b>-1.18 (-2.20; -0.15)</b> | <b>-2.69 (-5.09; -0.28)</b> | -1.91 (-3.91; -0.08)        | -0.01 (-0.02; 0.00)      | <b>-1.44 (-2.76; -0.11)</b> |
| Hazardous drinkers   | -0.26 (-1.54; 1.01)         | -0.16 (-3.16; 2.84)         | -0.61 (-3.09; 1.87)         | 0.00 (-0.01; 0.02)       | 0.13 (-1.52; 1.77)          |
| Harmful drinkers     | 0.40 (-2.65; 3.46)          | 3.23 (-3.94; 10.41)         | 0.88 (-5.05; 6.82)          | 0.02 (-0.02; 0.06)       | 2.04 (-1.90; 5.98)          |

Abbreviation: Body Mass Index (BMI), Body Weight (BW), Hip Circumference (HC), Waist Circumference (WC), Waist-to-hip ratio (WHR), fat-mass percentage (%FM)/. \*Adjusted as per Model 4 in Table 3 plus dietary quality (unhealthy, average, healthy) and physical activity level (inactive, moderately inactive, moderately active, active).
